# Supplementary material for: COVID-19: Immunohistochemical Analysis of TGF-β Signaling Pathways in Pulmonary Fibrosis
Source: MDPI journal article supplement (doi:10.3390/ijms23010168), 2021-12-24
Supplement: s1 [file s1]

**Supplementary Table S1.** Comparison between basal CONTROL, COVID-19 and H1N1 Groups according to immunohistochemical findings.

| Data                                  | CONTROL<br>(N=11)   | COVID-19<br>(N = 24) | H1N1<br>(N = 10)  |
|---------------------------------------|---------------------|----------------------|-------------------|
| <i>Anti-ACE-2<sup>1</sup></i>         | 2.14 (0.46-5.16)    | 9.76 (3.1-34.95)     | 3.07 (1.51-9.03)  |
|                                       | <0.0001*            |                      | 0.0005**          |
| <i>Anti-AKT-1<sup>1</sup></i>         | 0.31 (0.12-2.49)    | 1.39 (0.1-8.34)      | 0.85 (0.15-5.54)  |
|                                       | 0.022*              |                      | 0.249**           |
| <i>Anti-Caveolin-1<sup>1,a</sup></i>  | 24.14 (16.87-28.76) | 4.34 (0.23-16.34)    | 4.84 (1.6-12.46)  |
|                                       | <0.0001*            |                      | 0.668**           |
| <i>Anti-CD44v6<sup>1</sup></i>        | 0.27 (0.09-2.2)     | 7.89 (2.42-22.22)    | 0.09 (0.003-0.18) |
|                                       | <0.0001*            |                      | <0.0001**         |
| <i>Anti-IL-4<sup>1</sup></i>          | 2.11 (0.23-11.24)   | 17.49 (1.02-32.4)    | 1.35 (0.36-3.41)  |
|                                       | <0.0001*            |                      | <0.0001**         |
| <i>Anti-MMP-9<sup>1</sup></i>         | 2.33 (0.46-8.62)    | 4.95 (1.86-18.42)    | 6.91 (3.33-22.8)  |
|                                       | 0.004*              |                      | 0.609**           |
| <i>Anti-α-SMA<sup>1</sup></i>         | 0.39 (0.02-2.46)    | 7.46 (2.57-37.15)    | 0.57 (0.07-1.75)  |
|                                       | <0.0001*            |                      | <0.0001*          |
| <i>Anti-Sphingosine-1<sup>1</sup></i> | 4 (3-5)             | 6 (5-7)              | 5 (4-6)           |
|                                       | <0.0001*            |                      | 0.063**           |
| <i>Anti-TGF-β1<sup>1</sup></i>        | 1.13 (0.4-7.04)     | 2.97 (0.69-21.91)    | 3.18 (1.16-5.06)  |
|                                       | 0.0315*             |                      | 0.677**           |

Subtitle:<sup>1</sup> Median (Min-Max); <sup>a</sup> n=23; \* = *p*-values obtained were compared between COVID-19 versus COTROL. \*\* = *p*-values obtained were compared between COVID-19 and H1N1 group; *p*-values were performed using the non-parametric Mann Whitney test (*p* <0,05).

**Supplementary Table S2: Resource table**

| Antibody            | Type              | Clone/Code | Dilution | Source        | Species Reactivity             | RRID        |
|---------------------|-------------------|------------|----------|---------------|--------------------------------|-------------|
| Anti-ACE-2          | Polyclonal/Rabbit | Ab272690   | 1:50     | Abcam         | Human <sup>1</sup>             | *           |
| Anti-AKT-1          | Monoclonal/Rabbit | Y89        | 1:200    | Abcam         | Human <sup>2</sup>             | *           |
| Anti-Caveolin-1     | Monoclonal/Rabbit | EP353      | 1:200    | BioSB         | Human <sup>3</sup>             | *           |
| Anti-CD44v6         | Monoclonal/Mouse  | VFF-7      | 1:200    | Novocastra    | Human <sup>4</sup>             | *           |
| Anti-IL-4           | Polyclonal/Rabbit | PA5-25165  | 1:200    | Thermo Fisher | Human, Mouse <sup>5</sup>      | AB_2542665  |
| Anti-MMP-9          | Monoclonal/Rabbit | EP1254     | 1:200    | Abcam         | Human, Rat <sup>6</sup>        | AB_1267245  |
| Anti- $\alpha$ -SMA | Polyclonal/Rabbit | Ab5694     | 1:600    | Abcam         | Human, Mouse <sup>7</sup>      | *           |
| Anti-Sphingosine-1  | Polyclonal/Rabbit | Ab71700    | 1:200    | Abcam         | Human, Rat, Mouse <sup>8</sup> | AB_1270891  |
| Anti-TGF- $\beta$ 1 | Polyclonal/Rabbit | E11262     | 1:200    | Spring        | Human <sup>9</sup>             | AB_11219319 |

<sup>1</sup> <https://www.abcam.com/ace2-antibody-ab272690.html>

<sup>2</sup> <https://www.abcam.com/akt3--akt2--akt1-antibody-y89-ab32505.html>

<sup>3</sup> <https://www.biosb.com/biosb-products/caveolin-1-antibody-rmab-ep353/>

<sup>4</sup> [https://issuu.com/leicabiosystems/docs/2013\\_ihc\\_and\\_isb\\_product\\_catalog\\_ro/119](https://issuu.com/leicabiosystems/docs/2013_ihc_and_isb_product_catalog_ro/119)

<sup>5</sup> <https://www.thermofisher.com/antibody/product/IL-4-Antibody-Polyclonal/PA5-25165>

<sup>6</sup> <https://www.abcam.com/mmp9-antibody-ep1254-ab76003.html>

<sup>7</sup> <https://www.abcam.com/alpha-smooth-muscle-actin-antibody-ab5694.html>

<sup>8</sup> <https://www.abcam.com/sphk1-antibody-ab71700.html>

<sup>9</sup> [https://issuu.com/fermelobiotec/docs/catalogo\\_spring\\_bioscience](https://issuu.com/fermelobiotec/docs/catalogo_spring_bioscience)

\* There is no record.
